# Supplementary material for: Unraveling human protein interaction networks underlying co-occurrences of diseases and pathological conditions
Source: J Transl Med. 2014 Apr 14;12:99. doi: 10.1186/1479-5876-12-99 (PMC4021415; doi:10.1186/1479-5876-12-99)
Supplement: Additional file 2: Table S2 — List of diseases and pathological symptom related genes. [file 1479-5876-12-99-S2.xlsx]

## Sheet: diseaseSet_genecards.txt
Disease	Entrez Gene ID	Gene symbol	Description
BreastCancer	25	ABL1	c-abl oncogene 1, non-receptor tyrosine kinase
BreastCancer	1636	ACE	angiotensin I converting enzyme (peptidyl-dipeptidase A) 1
BreastCancer	100	ADA	adenosine deaminase
BreastCancer	207	AKT1	v-akt murine thymoma viral oncogene homolog 1
BreastCancer	249	ALPL	alkaline phosphatase, liver/bone/kidney
BreastCancer	290	ANPEP	alanyl (membrane) aminopeptidase
BreastCancer	324	APC	adenomatous polyposis coli
BreastCancer	367	AR	androgen receptor
BreastCancer	472	ATM	ataxia telangiectasia mutated
BreastCancer	596	BCL2	B-cell CLL/lymphoma 2
BreastCancer	673	BRAF	v-raf murine sarcoma viral oncogene homolog B1
BreastCancer	672	BRCA1	breast cancer 1, early onset
BreastCancer	595	CCND1	cyclin D1
BreastCancer	896	CCND3	cyclin D3
BreastCancer	947	CD34	CD34 molecule
BreastCancer	960	CD44	CD44 molecule (Indian blood group)
BreastCancer	999	CDH1	cadherin 1, type 1, E-cadherin (epithelial)
BreastCancer	1017	CDK2	cyclin-dependent kinase 2
BreastCancer	1019	CDK4	cyclin-dependent kinase 4
BreastCancer	1026	CDKN1A	cyclin-dependent kinase inhibitor 1A (p21, Cip1)
BreastCancer	1027	CDKN1B	cyclin-dependent kinase inhibitor 1B (p27, Kip1)
BreastCancer	1111	CHEK1	checkpoint kinase 1
BreastCancer	11200	CHEK2	checkpoint kinase 2
BreastCancer	1191	CLU	clusterin
BreastCancer	1499	CTNNB1	catenin (cadherin-associated protein), beta 1, 88kDa
BreastCancer	1674	DES	desmin
BreastCancer	1956	EGFR	epidermal growth factor receptor
BreastCancer	2026	ENO2	enolase 2 (gamma, neuronal)
BreastCancer	2048	EPHB2	EPH receptor B2
BreastCancer	2064	ERBB2	v-erb-b2 erythroblastic leukemia viral oncogene homolog 2, neuro/glioblastoma derived oncogene homolog (avian)
BreastCancer	2099	ESR1	estrogen receptor 1
BreastCancer	2100	ESR2	estrogen receptor 2 (ER beta)
BreastCancer	2113	ETS1	v-ets erythroblastosis virus E26 oncogene homolog 1 (avian)
BreastCancer	2194	FASN	fatty acid synthase
BreastCancer	2261	FGFR3	fibroblast growth factor receptor 3
BreastCancer	2324	FLT4	fms-related tyrosine kinase 4
BreastCancer	2778	GNAS	GNAS complex locus
BreastCancer	2950	GSTP1	glutathione S-transferase pi 1
BreastCancer	3383	ICAM1	intercellular adhesion molecule 1
BreastCancer	3480	IGF1R	insulin-like growth factor 1 receptor
BreastCancer	3558	IL2	interleukin 2
BreastCancer	3569	IL6	interleukin 6 (interferon, beta 2)
BreastCancer	3717	JAK2	Janus kinase 2
BreastCancer	3791	KDR	kinase insert domain receptor (a type III receptor tyrosine kinase)
BreastCancer	3815	KIT	v-kit Hardy-Zuckerman 4 feline sarcoma viral oncogene homolog
BreastCancer	354	KLK3	kallikrein-related peptidase 3
BreastCancer	4193	MDM2	Mdm2, p53 E3 ubiquitin protein ligase homolog (mouse)
BreastCancer	4292	MLH1	mutL homolog 1, colon cancer, nonpolyposis type 2 (E. coli)
BreastCancer	4319	MMP10	matrix metallopeptidase 10 (stromelysin 2)
BreastCancer	4313	MMP2	matrix metallopeptidase 2 (gelatinase A, 72kDa gelatinase, 72kDa type IV collagenase)
BreastCancer	4314	MMP3	matrix metallopeptidase 3 (stromelysin 1, progelatinase)
BreastCancer	4316	MMP7	matrix metallopeptidase 7 (matrilysin, uterine)
BreastCancer	4318	MMP9	matrix metallopeptidase 9 (gelatinase B, 92kDa gelatinase, 92kDa type IV collagenase)
BreastCancer	4436	MSH2	mutS homolog 2, colon cancer, nonpolyposis type 1 (E. coli)
BreastCancer	2956	MSH6	mutS homolog 6 (E. coli)
BreastCancer	4609	MYC	v-myc myelocytomatosis viral oncogene homolog (avian)
BreastCancer	5156	PDGFRA	platelet-derived growth factor receptor, alpha polypeptide
BreastCancer	5159	PDGFRB	platelet-derived growth factor receptor, beta polypeptide
BreastCancer	5241	PGR	progesterone receptor
BreastCancer	5290	PIK3CA	phosphatidylinositol-4,5-bisphosphate 3-kinase, catalytic subunit alpha
BreastCancer	5468	PPARG	peroxisome proliferator-activated receptor gamma
BreastCancer	5578	PRKCA	protein kinase C, alpha
BreastCancer	5728	PTEN	phosphatase and tensin homolog
BreastCancer	5743	PTGS2	prostaglandin-endoperoxide synthase 2 (prostaglandin G/H synthase and cyclooxygenase)
BreastCancer	5888	RAD51	RAD51 homolog (S. cerevisiae)
BreastCancer	5925	RB1	retinoblastoma 1
BreastCancer	5979	RET	ret proto-oncogene
BreastCancer	6714	SRC	v-src sarcoma (Schmidt-Ruppin A-2) viral oncogene homolog (avian)
BreastCancer	6794	STK11	serine/threonine kinase 11
BreastCancer	7015	TERT	telomerase reverse transcriptase
BreastCancer	7077	TIMP2	TIMP metallopeptidase inhibitor 2
BreastCancer	7157	TP53	tumor protein p53
BreastCancer	7298	TYMS	thymidylate synthetase
BreastCancer	7321	UBE2D1	ubiquitin-conjugating enzyme E2D 1
BreastCancer	7431	VIM	vimentin
BreastCancer	7450	VWF	von Willebrand factor
ColonCancer	25	ABL1	c-abl oncogene 1, non-receptor tyrosine kinase
ColonCancer	1636	ACE	angiotensin I converting enzyme (peptidyl-dipeptidase A) 1
ColonCancer	100	ADA	adenosine deaminase
ColonCancer	249	ALPL	alkaline phosphatase, liver/bone/kidney
ColonCancer	290	ANPEP	alanyl (membrane) aminopeptidase
ColonCancer	324	APC	adenomatous polyposis coli
ColonCancer	367	AR	androgen receptor
ColonCancer	472	ATM	ataxia telangiectasia mutated
ColonCancer	596	BCL2	B-cell CLL/lymphoma 2
ColonCancer	673	BRAF	v-raf murine sarcoma viral oncogene homolog B1
ColonCancer	672	BRCA1	breast cancer 1, early onset
ColonCancer	595	CCND1	cyclin D1
ColonCancer	896	CCND3	cyclin D3
ColonCancer	960	CD44	CD44 molecule (Indian blood group)
ColonCancer	999	CDH1	cadherin 1, type 1, E-cadherin (epithelial)
ColonCancer	1017	CDK2	cyclin-dependent kinase 2
ColonCancer	1019	CDK4	cyclin-dependent kinase 4
ColonCancer	1026	CDKN1A	cyclin-dependent kinase inhibitor 1A (p21, Cip1)
ColonCancer	1027	CDKN1B	cyclin-dependent kinase inhibitor 1B (p27, Kip1)
ColonCancer	1111	CHEK1	checkpoint kinase 1
ColonCancer	11200	CHEK2	checkpoint kinase 2
ColonCancer	1191	CLU	clusterin
ColonCancer	1499	CTNNB1	catenin (cadherin-associated protein), beta 1, 88kDa
ColonCancer	1674	DES	desmin
ColonCancer	1956	EGFR	epidermal growth factor receptor
ColonCancer	2026	ENO2	enolase 2 (gamma, neuronal)
ColonCancer	2048	EPHB2	EPH receptor B2
ColonCancer	2064	ERBB2	v-erb-b2 erythroblastic leukemia viral oncogene homolog 2, neuro/glioblastoma derived oncogene homolog (avian)
ColonCancer	2099	ESR1	estrogen receptor 1
ColonCancer	2100	ESR2	estrogen receptor 2 (ER beta)
ColonCancer	2113	ETS1	v-ets erythroblastosis virus E26 oncogene homolog 1 (avian)
ColonCancer	2194	FASN	fatty acid synthase
ColonCancer	2324	FLT4	fms-related tyrosine kinase 4
ColonCancer	2950	GSTP1	glutathione S-transferase pi 1
ColonCancer	3383	ICAM1	intercellular adhesion molecule 1
ColonCancer	3480	IGF1R	insulin-like growth factor 1 receptor
ColonCancer	3558	IL2	interleukin 2
ColonCancer	3569	IL6	interleukin 6 (interferon, beta 2)
ColonCancer	3717	JAK2	Janus kinase 2
ColonCancer	3791	KDR	kinase insert domain receptor (a type III receptor tyrosine kinase)
ColonCancer	3815	KIT	v-kit Hardy-Zuckerman 4 feline sarcoma viral oncogene homolog
ColonCancer	4193	MDM2	Mdm2, p53 E3 ubiquitin protein ligase homolog (mouse)
ColonCancer	4292	MLH1	mutL homolog 1, colon cancer, nonpolyposis type 2 (E. coli)
ColonCancer	4319	MMP10	matrix metallopeptidase 10 (stromelysin 2)
ColonCancer	4313	MMP2	matrix metallopeptidase 2 (gelatinase A, 72kDa gelatinase, 72kDa type IV collagenase)
ColonCancer	4314	MMP3	matrix metallopeptidase 3 (stromelysin 1, progelatinase)
ColonCancer	4316	MMP7	matrix metallopeptidase 7 (matrilysin, uterine)
ColonCancer	4318	MMP9	matrix metallopeptidase 9 (gelatinase B, 92kDa gelatinase, 92kDa type IV collagenase)
ColonCancer	4436	MSH2	mutS homolog 2, colon cancer, nonpolyposis type 1 (E. coli)
ColonCancer	2956	MSH6	mutS homolog 6 (E. coli)
ColonCancer	4609	MYC	v-myc myelocytomatosis viral oncogene homolog (avian)
ColonCancer	5156	PDGFRA	platelet-derived growth factor receptor, alpha polypeptide
ColonCancer	5159	PDGFRB	platelet-derived growth factor receptor, beta polypeptide
ColonCancer	5241	PGR	progesterone receptor
ColonCancer	5468	PPARG	peroxisome proliferator-activated receptor gamma
ColonCancer	5578	PRKCA	protein kinase C, alpha
ColonCancer	5728	PTEN	phosphatase and tensin homolog
ColonCancer	5743	PTGS2	prostaglandin-endoperoxide synthase 2 (prostaglandin G/H synthase and cyclooxygenase)
ColonCancer	5925	RB1	retinoblastoma 1
ColonCancer	5979	RET	ret proto-oncogene
ColonCancer	6714	SRC	v-src sarcoma (Schmidt-Ruppin A-2) viral oncogene homolog (avian)
ColonCancer	6794	STK11	serine/threonine kinase 11
ColonCancer	7015	TERT	telomerase reverse transcriptase
ColonCancer	7077	TIMP2	TIMP metallopeptidase inhibitor 2
ColonCancer	7157	TP53	tumor protein p53
ColonCancer	7298	TYMS	thymidylate synthetase
ColonCancer	7431	VIM	vimentin
ColonCancer	7450	VWF	von Willebrand factor
immuneDisorder	100	ADA	adenosine deaminase
immuneDisorder	673	BRAF	v-raf murine sarcoma viral oncogene homolog B1
immuneDisorder	841	CASP8	caspase 8, apoptosis-related cysteine peptidase
immuneDisorder	2261	FGFR3	fibroblast growth factor receptor 3
immuneDisorder	2629	GBA	glucosidase, beta, acid
immuneDisorder	3383	ICAM1	intercellular adhesion molecule 1
immuneDisorder	3554	IL1R1	interleukin 1 receptor, type I
immuneDisorder	3558	IL2	interleukin 2
immuneDisorder	3559	IL2RA	interleukin 2 receptor, alpha
immuneDisorder	3676	ITGA4	integrin, alpha 4 (antigen CD49D, alpha 4 subunit of VLA-4 receptor)
immuneDisorder	3718	JAK3	Janus kinase 3
immuneDisorder	3981	LIG4	ligase IV, DNA, ATP-dependent
immuneDisorder	4353	MPO	myeloperoxidase
immuneDisorder	5336	PLCG2	phospholipase C, gamma 2 (phosphatidylinositol-specific)
immuneDisorder	5788	PTPRC	protein tyrosine phosphatase, receptor type, C
immuneDisorder	6403	SELP	selectin P (granule membrane protein 140kDa, antigen CD62)
immuneDisorder	6772	STAT1	signal transducer and activator of transcription 1, 91kDa
immuneDisorder	6774	STAT3	signal transducer and activator of transcription 3 (acute-phase response factor)
immuneDisorder	7132	TNFRSF1A	tumor necrosis factor receptor superfamily, member 1A
immuneDisorder	7421	VDR	vitamin D (1,25- dihydroxyvitamin D3) receptor
InsRes	217	ALDH2	aldehyde dehydrogenase 2 family (mitochondrial)
InsRes	1803	DPP4	dipeptidyl-peptidase 4
InsRes	2645	GCK	glucokinase (hexokinase 4)
InsRes	3099	HK2	hexokinase 2
InsRes	3479	IGF1	insulin-like growth factor 1 (somatomedin C)
InsRes	3643	INSR	insulin receptor
InsRes	3667	IRS1	insulin receptor substrate 1
InsRes	4023	LPL	lipoprotein lipase
InsRes	5443	POMC	proopiomelanocortin
InsRes	5468	PPARG	peroxisome proliferator-activated receptor gamma
InsRes	5054	SERPINE1	serpin peptidase inhibitor, clade E (nexin, plasminogen activator inhibitor type 1), member 1
Obesity	5243	ABCB1	ATP-binding cassette, sub-family B (MDR/TAP), member 1
Obesity	1636	ACE	angiotensin I converting enzyme (peptidyl-dipeptidase A) 1
Obesity	43	ACHE	acetylcholinesterase
Obesity	100	ADA	adenosine deaminase
Obesity	134	ADORA1	adenosine A1 receptor
Obesity	154	ADRB2	adrenoceptor beta 2, surface
Obesity	185	AGTR1	angiotensin II receptor, type 1
Obesity	231	AKR1B1	aldo-keto reductase family 1, member B1 (aldose reductase)
Obesity	8644	AKR1C3	aldo-keto reductase family 1, member C3
Obesity	207	AKT1	v-akt murine thymoma viral oncogene homolog 1
Obesity	208	AKT2	v-akt murine thymoma viral oncogene homolog 2
Obesity	217	ALDH2	aldehyde dehydrogenase 2 family (mitochondrial)
Obesity	7915	ALDH5A1	aldehyde dehydrogenase 5 family, member A1
Obesity	226	ALDOA	aldolase A, fructose-bisphosphate
Obesity	249	ALPL	alkaline phosphatase, liver/bone/kidney
Obesity	290	ANPEP	alanyl (membrane) aminopeptidase
Obesity	324	APC	adenomatous polyposis coli
Obesity	351	APP	amyloid beta (A4) precursor protein
Obesity	367	AR	androgen receptor
Obesity	383	ARG1	arginase, liver
Obesity	477	ATP1A2	ATPase, Na+/K+ transporting, alpha 2 polypeptide
Obesity	487	ATP2A1	ATPase, Ca++ transporting, cardiac muscle, fast twitch 1
Obesity	590	BCHE	butyrylcholinesterase
Obesity	652	BMP4	bone morphogenetic protein 4
Obesity	657	BMPR1A	bone morphogenetic protein receptor, type IA
Obesity	659	BMPR2	bone morphogenetic protein receptor, type II (serine/threonine kinase)
Obesity	718	C3	complement component 3
Obesity	834	CASP1	caspase 1, apoptosis-related cysteine peptidase
Obesity	836	CASP3	caspase 3, apoptosis-related cysteine peptidase
Obesity	847	CAT	catalase
Obesity	857	CAV1	caveolin 1, caveolae protein, 22kDa
Obesity	875	CBS	cystathionine-beta-synthase
Obesity	887	CCKBR	cholecystokinin B receptor
Obesity	6347	CCL2	chemokine (C-C motif) ligand 2
Obesity	960	CD44	CD44 molecule (Indian blood group)
Obesity	1019	CDK4	cyclin-dependent kinase 4
Obesity	1027	CDKN1B	cyclin-dependent kinase inhibitor 1B (p27, Kip1)
Obesity	3075	CFH	complement factor H
Obesity	1191	CLU	clusterin
Obesity	1312	COMT	catechol-O-methyltransferase
Obesity	1509	CTSD	cathepsin D
Obesity	1513	CTSK	cathepsin K
Obesity	1544	CYP1A2	cytochrome P450, family 1, subfamily A, polypeptide 2
Obesity	1803	DPP4	dipeptidyl-peptidase 4
Obesity	1909	EDNRA	endothelin receptor type A
Obesity	2064	ERBB2	v-erb-b2 erythroblastic leukemia viral oncogene homolog 2, neuro/glioblastoma derived oncogene homolog (avian)
Obesity	2068	ERCC2	excision repair cross-complementing rodent repair deficiency, complementation group 2
Obesity	2099	ESR1	estrogen receptor 1
Obesity	2100	ESR2	estrogen receptor 2 (ER beta)
Obesity	2113	ETS1	v-ets erythroblastosis virus E26 oncogene homolog 1 (avian)
Obesity	2147	F2	coagulation factor II (thrombin)
Obesity	2158	F9	coagulation factor IX
Obesity	355	FAS	Fas (TNF receptor superfamily, member 6)
Obesity	2194	FASN	fatty acid synthase
Obesity	2247	FGF2	fibroblast growth factor 2 (basic)
Obesity	2260	FGFR1	fibroblast growth factor receptor 1
Obesity	2321	FLT1	fms-related tyrosine kinase 1
Obesity	2353	FOS	FBJ murine osteosarcoma viral oncogene homolog
Obesity	2597	GAPDH	glyceraldehyde-3-phosphate dehydrogenase
Obesity	2645	GCK	glucokinase (hexokinase 4)
Obesity	2778	GNAS	GNAS complex locus
Obesity	2902	GRIN1	glutamate receptor, ionotropic, N-methyl D-aspartate 1
Obesity	2932	GSK3B	glycogen synthase kinase 3 beta
Obesity	2936	GSR	glutathione reductase
Obesity	2950	GSTP1	glutathione S-transferase pi 1
Obesity	2997	GYS1	glycogen synthase 1 (muscle)
Obesity	3082	HGF	hepatocyte growth factor (hepapoietin A; scatter factor)
Obesity	3091	HIF1A	hypoxia inducible factor 1, alpha subunit (basic helix-loop-helix transcription factor)
Obesity	3099	HK2	hexokinase 2
Obesity	3162	HMOX1	heme oxygenase (decycling) 1
Obesity	3303	HSPA1A	heat shock 70kDa protein 1A
Obesity	3358	HTR2C	5-hydroxytryptamine (serotonin) receptor 2C, G protein-coupled
Obesity	3383	ICAM1	intercellular adhesion molecule 1
Obesity	3417	IDH1	isocitrate dehydrogenase 1 (NADP+), soluble
Obesity	3479	IGF1	insulin-like growth factor 1 (somatomedin C)
Obesity	3480	IGF1R	insulin-like growth factor 1 receptor
Obesity	3481	IGF2	insulin-like growth factor 2 (somatomedin A)
Obesity	3551	IKBKB	inhibitor of kappa light polypeptide gene enhancer in B-cells, kinase beta
Obesity	3553	IL1B	interleukin 1, beta
Obesity	3554	IL1R1	interleukin 1 receptor, type I
Obesity	3558	IL2	interleukin 2
Obesity	3559	IL2RA	interleukin 2 receptor, alpha
Obesity	3569	IL6	interleukin 6 (interferon, beta 2)
Obesity	3576	IL8	interleukin 8
Obesity	3643	INSR	insulin receptor
Obesity	3667	IRS1	insulin receptor substrate 1
Obesity	3689	ITGB2	integrin, beta 2 (complement component 3 receptor 3 and 4 subunit)
Obesity	3690	ITGB3	integrin, beta 3 (platelet glycoprotein IIIa, antigen CD61)
Obesity	3717	JAK2	Janus kinase 2
Obesity	3725	JUN	jun proto-oncogene
Obesity	3784	KCNQ1	potassium voltage-gated channel, KQT-like subfamily, member 1
Obesity	354	KLK3	kallikrein-related peptidase 3
Obesity	3949	LDLR	low density lipoprotein receptor
Obesity	4000	LMNA	lamin A/C
Obesity	4023	LPL	lipoprotein lipase
Obesity	4035	LRP1	low density lipoprotein receptor-related protein 1
Obesity	4128	MAOA	monoamine oxidase A
Obesity	5594	MAPK1	mitogen-activated protein kinase 1
Obesity	5595	MAPK3	mitogen-activated protein kinase 3
Obesity	5599	MAPK8	mitogen-activated protein kinase 8
Obesity	4321	MMP12	matrix metallopeptidase 12 (macrophage elastase)
Obesity	4323	MMP14	matrix metallopeptidase 14 (membrane-inserted)
Obesity	4313	MMP2	matrix metallopeptidase 2 (gelatinase A, 72kDa gelatinase, 72kDa type IV collagenase)
Obesity	4314	MMP3	matrix metallopeptidase 3 (stromelysin 1, progelatinase)
Obesity	4317	MMP8	matrix metallopeptidase 8 (neutrophil collagenase)
Obesity	4318	MMP9	matrix metallopeptidase 9 (gelatinase B, 92kDa gelatinase, 92kDa type IV collagenase)
Obesity	4353	MPO	myeloperoxidase
Obesity	8202	NCOA3	nuclear receptor coactivator 3
Obesity	4790	NFKB1	nuclear factor of kappa light polypeptide gene enhancer in B-cells 1
Obesity	4792	NFKBIA	nuclear factor of kappa light polypeptide gene enhancer in B-cells inhibitor, alpha
Obesity	4842	NOS1	nitric oxide synthase 1 (neuronal)
Obesity	4846	NOS3	nitric oxide synthase 3 (endothelial cell)
Obesity	1728	NQO1	NAD(P)H dehydrogenase, quinone 1
Obesity	2908	NR3C1	nuclear receptor subfamily 3, group C, member 1 (glucocorticoid receptor)
Obesity	4915	NTRK2	neurotrophic tyrosine kinase, receptor, type 2
Obesity	5170	PDPK1	3-phosphoinositide dependent protein kinase-1
Obesity	5241	PGR	progesterone receptor
Obesity	5290	PIK3CA	phosphatidylinositol-4,5-bisphosphate 3-kinase, catalytic subunit alpha
Obesity	5294	PIK3CG	phosphatidylinositol-4,5-bisphosphate 3-kinase, catalytic subunit gamma
Obesity	5295	PIK3R1	phosphoinositide-3-kinase, regulatory subunit 1 (alpha)
Obesity	5320	PLA2G2A	phospholipase A2, group IIA (platelets, synovial fluid)
Obesity	7941	PLA2G7	phospholipase A2, group VII (platelet-activating factor acetylhydrolase, plasma)
Obesity	5327	PLAT	plasminogen activator, tissue
Obesity	5443	POMC	proopiomelanocortin
Obesity	5465	PPARA	peroxisome proliferator-activated receptor alpha
Obesity	5468	PPARG	peroxisome proliferator-activated receptor gamma
Obesity	9588	PRDX6	peroxiredoxin 6
Obesity	5573	PRKAR1A	protein kinase, cAMP-dependent, regulatory, type I, alpha
Obesity	5578	PRKCA	protein kinase C, alpha
Obesity	5590	PRKCZ	protein kinase C, zeta
Obesity	5728	PTEN	phosphatase and tensin homolog
Obesity	5742	PTGS1	prostaglandin-endoperoxide synthase 1 (prostaglandin G/H synthase and cyclooxygenase)
Obesity	5743	PTGS2	prostaglandin-endoperoxide synthase 2 (prostaglandin G/H synthase and cyclooxygenase)
Obesity	5770	PTPN1	protein tyrosine phosphatase, non-receptor type 1
Obesity	5781	PTPN11	protein tyrosine phosphatase, non-receptor type 11
Obesity	5792	PTPRF	protein tyrosine phosphatase, receptor type, F
Obesity	5879	RAC1	ras-related C3 botulinum toxin substrate 1 (rho family, small GTP binding protein Rac1)
Obesity	5914	RARA	retinoic acid receptor, alpha
Obesity	5915	RARB	retinoic acid receptor, beta
Obesity	6198	RPS6KB1	ribosomal protein S6 kinase, 70kDa, polypeptide 1
Obesity	6256	RXRA	retinoid X receptor, alpha
Obesity	6401	SELE	selectin E
Obesity	6402	SELL	selectin L
Obesity	6403	SELP	selectin P (granule membrane protein 140kDa, antigen CD62)
Obesity	5054	SERPINE1	serpin peptidase inhibitor, clade E (nexin, plasminogen activator inhibitor type 1), member 1
Obesity	6446	SGK1	serum/glucocorticoid regulated kinase 1
Obesity	6531	SLC6A3	solute carrier family 6 (neurotransmitter transporter, dopamine), member 3
Obesity	6647	SOD1	superoxide dismutase 1, soluble
Obesity	6648	SOD2	superoxide dismutase 2, mitochondrial
Obesity	6696	SPP1	secreted phosphoprotein 1
Obesity	6714	SRC	v-src sarcoma (Schmidt-Ruppin A-2) viral oncogene homolog (avian)
Obesity	6752	SSTR2	somatostatin receptor 2
Obesity	6772	STAT1	signal transducer and activator of transcription 1, 91kDa
Obesity	6774	STAT3	signal transducer and activator of transcription 3 (acute-phase response factor)
Obesity	6776	STAT5A	signal transducer and activator of transcription 5A
Obesity	6794	STK11	serine/threonine kinase 11
Obesity	7018	TF	transferrin
Obesity	7037	TFRC	transferrin receptor (p90, CD71)
Obesity	7040	TGFB1	transforming growth factor, beta 1
Obesity	7054	TH	tyrosine hydroxylase
Obesity	7077	TIMP2	TIMP metallopeptidase inhibitor 2
Obesity	7099	TLR4	toll-like receptor 4
Obesity	7124	TNF	tumor necrosis factor
Obesity	7132	TNFRSF1A	tumor necrosis factor receptor superfamily, member 1A
Obesity	7133	TNFRSF1B	tumor necrosis factor receptor superfamily, member 1B
Obesity	7157	TP53	tumor protein p53
Obesity	7345	UCHL1	ubiquitin carboxyl-terminal esterase L1 (ubiquitin thiolesterase)
Obesity	7421	VDR	vitamin D (1,25- dihydroxyvitamin D3) receptor
Obesity	7422	VEGFA	vascular endothelial growth factor A
Obesity	7450	VWF	von Willebrand factor
ProstateCancer	25	ABL1	c-abl oncogene 1, non-receptor tyrosine kinase
ProstateCancer	1636	ACE	angiotensin I converting enzyme (peptidyl-dipeptidase A) 1
ProstateCancer	100	ADA	adenosine deaminase
ProstateCancer	290	ANPEP	alanyl (membrane) aminopeptidase
ProstateCancer	324	APC	adenomatous polyposis coli
ProstateCancer	367	AR	androgen receptor
ProstateCancer	472	ATM	ataxia telangiectasia mutated
ProstateCancer	596	BCL2	B-cell CLL/lymphoma 2
ProstateCancer	673	BRAF	v-raf murine sarcoma viral oncogene homolog B1
ProstateCancer	672	BRCA1	breast cancer 1, early onset
ProstateCancer	595	CCND1	cyclin D1
ProstateCancer	896	CCND3	cyclin D3
ProstateCancer	947	CD34	CD34 molecule
ProstateCancer	960	CD44	CD44 molecule (Indian blood group)
ProstateCancer	999	CDH1	cadherin 1, type 1, E-cadherin (epithelial)
ProstateCancer	1017	CDK2	cyclin-dependent kinase 2
ProstateCancer	1019	CDK4	cyclin-dependent kinase 4
ProstateCancer	1026	CDKN1A	cyclin-dependent kinase inhibitor 1A (p21, Cip1)
ProstateCancer	1027	CDKN1B	cyclin-dependent kinase inhibitor 1B (p27, Kip1)
ProstateCancer	1111	CHEK1	checkpoint kinase 1
ProstateCancer	11200	CHEK2	checkpoint kinase 2
ProstateCancer	1191	CLU	clusterin
ProstateCancer	1499	CTNNB1	catenin (cadherin-associated protein), beta 1, 88kDa
ProstateCancer	1674	DES	desmin
ProstateCancer	1956	EGFR	epidermal growth factor receptor
ProstateCancer	2026	ENO2	enolase 2 (gamma, neuronal)
ProstateCancer	2048	EPHB2	EPH receptor B2
ProstateCancer	2064	ERBB2	v-erb-b2 erythroblastic leukemia viral oncogene homolog 2, neuro/glioblastoma derived oncogene homolog (avian)
ProstateCancer	2099	ESR1	estrogen receptor 1
ProstateCancer	2100	ESR2	estrogen receptor 2 (ER beta)
ProstateCancer	2113	ETS1	v-ets erythroblastosis virus E26 oncogene homolog 1 (avian)
ProstateCancer	2194	FASN	fatty acid synthase
ProstateCancer	2261	FGFR3	fibroblast growth factor receptor 3
ProstateCancer	2324	FLT4	fms-related tyrosine kinase 4
ProstateCancer	2778	GNAS	GNAS complex locus
ProstateCancer	2950	GSTP1	glutathione S-transferase pi 1
ProstateCancer	3383	ICAM1	intercellular adhesion molecule 1
ProstateCancer	3480	IGF1R	insulin-like growth factor 1 receptor
ProstateCancer	3558	IL2	interleukin 2
ProstateCancer	3569	IL6	interleukin 6 (interferon, beta 2)
ProstateCancer	3717	JAK2	Janus kinase 2
ProstateCancer	3791	KDR	kinase insert domain receptor (a type III receptor tyrosine kinase)
ProstateCancer	3815	KIT	v-kit Hardy-Zuckerman 4 feline sarcoma viral oncogene homolog
ProstateCancer	354	KLK3	kallikrein-related peptidase 3
ProstateCancer	4193	MDM2	Mdm2, p53 E3 ubiquitin protein ligase homolog (mouse)
ProstateCancer	4292	MLH1	mutL homolog 1, colon cancer, nonpolyposis type 2 (E. coli)
ProstateCancer	4319	MMP10	matrix metallopeptidase 10 (stromelysin 2)
ProstateCancer	4313	MMP2	matrix metallopeptidase 2 (gelatinase A, 72kDa gelatinase, 72kDa type IV collagenase)
ProstateCancer	4314	MMP3	matrix metallopeptidase 3 (stromelysin 1, progelatinase)
ProstateCancer	4316	MMP7	matrix metallopeptidase 7 (matrilysin, uterine)
ProstateCancer	4318	MMP9	matrix metallopeptidase 9 (gelatinase B, 92kDa gelatinase, 92kDa type IV collagenase)
ProstateCancer	4436	MSH2	mutS homolog 2, colon cancer, nonpolyposis type 1 (E. coli)
ProstateCancer	2956	MSH6	mutS homolog 6 (E. coli)
ProstateCancer	4609	MYC	v-myc myelocytomatosis viral oncogene homolog (avian)
ProstateCancer	5156	PDGFRA	platelet-derived growth factor receptor, alpha polypeptide
ProstateCancer	5159	PDGFRB	platelet-derived growth factor receptor, beta polypeptide
ProstateCancer	5241	PGR	progesterone receptor
ProstateCancer	5468	PPARG	peroxisome proliferator-activated receptor gamma
ProstateCancer	5578	PRKCA	protein kinase C, alpha
ProstateCancer	5728	PTEN	phosphatase and tensin homolog
ProstateCancer	5743	PTGS2	prostaglandin-endoperoxide synthase 2 (prostaglandin G/H synthase and cyclooxygenase)
ProstateCancer	5925	RB1	retinoblastoma 1
ProstateCancer	5979	RET	ret proto-oncogene
ProstateCancer	6714	SRC	v-src sarcoma (Schmidt-Ruppin A-2) viral oncogene homolog (avian)
ProstateCancer	6794	STK11	serine/threonine kinase 11
ProstateCancer	7015	TERT	telomerase reverse transcriptase
ProstateCancer	7077	TIMP2	TIMP metallopeptidase inhibitor 2
ProstateCancer	7157	TP53	tumor protein p53
ProstateCancer	7298	TYMS	thymidylate synthetase
ProstateCancer	7431	VIM	vimentin
ProstateCancer	7450	VWF	von Willebrand factor
T2DM	1636	ACE	angiotensin I converting enzyme (peptidyl-dipeptidase A) 1
T2DM	59272	ACE2	angiotensin I converting enzyme (peptidyl-dipeptidase A) 2
T2DM	43	ACHE	acetylcholinesterase
T2DM	100	ADA	adenosine deaminase
T2DM	154	ADRB2	adrenoceptor beta 2, surface
T2DM	185	AGTR1	angiotensin II receptor, type 1
T2DM	231	AKR1B1	aldo-keto reductase family 1, member B1 (aldose reductase)
T2DM	207	AKT1	v-akt murine thymoma viral oncogene homolog 1
T2DM	208	AKT2	v-akt murine thymoma viral oncogene homolog 2
T2DM	217	ALDH2	aldehyde dehydrogenase 2 family (mitochondrial)
T2DM	249	ALPL	alkaline phosphatase, liver/bone/kidney
T2DM	308	ANXA5	annexin A5
T2DM	324	APC	adenomatous polyposis coli
T2DM	351	APP	amyloid beta (A4) precursor protein
T2DM	367	AR	androgen receptor
T2DM	477	ATP1A2	ATPase, Na+/K+ transporting, alpha 2 polypeptide
T2DM	488	ATP2A2	ATPase, Ca++ transporting, cardiac muscle, slow twitch 2
T2DM	581	BAX	BCL2-associated X protein
T2DM	590	BCHE	butyrylcholinesterase
T2DM	596	BCL2	B-cell CLL/lymphoma 2
T2DM	652	BMP4	bone morphogenetic protein 4
T2DM	655	BMP7	bone morphogenetic protein 7
T2DM	836	CASP3	caspase 3, apoptosis-related cysteine peptidase
T2DM	847	CAT	catalase
T2DM	857	CAV1	caveolin 1, caveolae protein, 22kDa
T2DM	875	CBS	cystathionine-beta-synthase
T2DM	6347	CCL2	chemokine (C-C motif) ligand 2
T2DM	920	CD4	CD4 molecule
T2DM	1019	CDK4	cyclin-dependent kinase 4
T2DM	1191	CLU	clusterin
T2DM	1277	COL1A1	collagen, type I, alpha 1
T2DM	1312	COMT	catechol-O-methyltransferase
T2DM	1499	CTNNB1	catenin (cadherin-associated protein), beta 1, 88kDa
T2DM	1508	CTSB	cathepsin B
T2DM	7852	CXCR4	chemokine (C-X-C motif) receptor 4
T2DM	1543	CYP1A1	cytochrome P450, family 1, subfamily A, polypeptide 1
T2DM	1565	CYP2D6	cytochrome P450, family 2, subfamily D, polypeptide 6
T2DM	1803	DPP4	dipeptidyl-peptidase 4
T2DM	2026	ENO2	enolase 2 (gamma, neuronal)
T2DM	2033	EP300	E1A binding protein p300
T2DM	2099	ESR1	estrogen receptor 1
T2DM	2113	ETS1	v-ets erythroblastosis virus E26 oncogene homolog 1 (avian)
T2DM	2159	F10	coagulation factor X
T2DM	2147	F2	coagulation factor II (thrombin)
T2DM	355	FAS	Fas (TNF receptor superfamily, member 6)
T2DM	2194	FASN	fatty acid synthase
T2DM	2247	FGF2	fibroblast growth factor 2 (basic)
T2DM	2321	FLT1	fms-related tyrosine kinase 1
T2DM	2335	FN1	fibronectin 1
T2DM	2597	GAPDH	glyceraldehyde-3-phosphate dehydrogenase
T2DM	2645	GCK	glucokinase (hexokinase 4)
T2DM	2720	GLB1	galactosidase, beta 1
T2DM	2778	GNAS	GNAS complex locus
T2DM	2936	GSR	glutathione reductase
T2DM	2950	GSTP1	glutathione S-transferase pi 1
T2DM	2997	GYS1	glycogen synthase 1 (muscle)
T2DM	3082	HGF	hepatocyte growth factor (hepapoietin A; scatter factor)
T2DM	3162	HMOX1	heme oxygenase (decycling) 1
T2DM	3265	HRAS	v-Ha-ras Harvey rat sarcoma viral oncogene homolog
T2DM	3303	HSPA1A	heat shock 70kDa protein 1A
T2DM	3312	HSPA8	heat shock 70kDa protein 8
T2DM	3383	ICAM1	intercellular adhesion molecule 1
T2DM	3479	IGF1	insulin-like growth factor 1 (somatomedin C)
T2DM	3480	IGF1R	insulin-like growth factor 1 receptor
T2DM	3481	IGF2	insulin-like growth factor 2 (somatomedin A)
T2DM	3553	IL1B	interleukin 1, beta
T2DM	3554	IL1R1	interleukin 1 receptor, type I
T2DM	3558	IL2	interleukin 2
T2DM	3559	IL2RA	interleukin 2 receptor, alpha
T2DM	3569	IL6	interleukin 6 (interferon, beta 2)
T2DM	3576	IL8	interleukin 8
T2DM	3643	INSR	insulin receptor
T2DM	3654	IRAK1	interleukin-1 receptor-associated kinase 1
T2DM	3667	IRS1	insulin receptor substrate 1
T2DM	3674	ITGA2B	integrin, alpha 2b (platelet glycoprotein IIb of IIb/IIIa complex, antigen CD41)
T2DM	3689	ITGB2	integrin, beta 2 (complement component 3 receptor 3 and 4 subunit)
T2DM	3690	ITGB3	integrin, beta 3 (platelet glycoprotein IIIa, antigen CD61)
T2DM	3725	JUN	jun proto-oncogene
T2DM	3784	KCNQ1	potassium voltage-gated channel, KQT-like subfamily, member 1
T2DM	354	KLK3	kallikrein-related peptidase 3
T2DM	3949	LDLR	low density lipoprotein receptor
T2DM	4000	LMNA	lamin A/C
T2DM	4023	LPL	lipoprotein lipase
T2DM	4067	LYN	v-yes-1 Yamaguchi sarcoma viral related oncogene homolog
T2DM	5594	MAPK1	mitogen-activated protein kinase 1
T2DM	5602	MAPK10	mitogen-activated protein kinase 10
T2DM	1432	MAPK14	mitogen-activated protein kinase 14
T2DM	5599	MAPK8	mitogen-activated protein kinase 8
T2DM	4137	MAPT	microtubule-associated protein tau
T2DM	4312	MMP1	matrix metallopeptidase 1 (interstitial collagenase)
T2DM	4323	MMP14	matrix metallopeptidase 14 (membrane-inserted)
T2DM	4313	MMP2	matrix metallopeptidase 2 (gelatinase A, 72kDa gelatinase, 72kDa type IV collagenase)
T2DM	4314	MMP3	matrix metallopeptidase 3 (stromelysin 1, progelatinase)
T2DM	4317	MMP8	matrix metallopeptidase 8 (neutrophil collagenase)
T2DM	4318	MMP9	matrix metallopeptidase 9 (gelatinase B, 92kDa gelatinase, 92kDa type IV collagenase)
T2DM	4353	MPO	myeloperoxidase
T2DM	4627	MYH9	myosin, heavy chain 9, non-muscle
T2DM	4790	NFKB1	nuclear factor of kappa light polypeptide gene enhancer in B-cells 1
T2DM	4792	NFKBIA	nuclear factor of kappa light polypeptide gene enhancer in B-cells inhibitor, alpha
T2DM	4842	NOS1	nitric oxide synthase 1 (neuronal)
T2DM	4846	NOS3	nitric oxide synthase 3 (endothelial cell)
T2DM	2908	NR3C1	nuclear receptor subfamily 3, group C, member 1 (glucocorticoid receptor)
T2DM	4968	OGG1	8-oxoguanine DNA glycosylase
T2DM	5294	PIK3CG	phosphatidylinositol-4,5-bisphosphate 3-kinase, catalytic subunit gamma
T2DM	5295	PIK3R1	phosphoinositide-3-kinase, regulatory subunit 1 (alpha)
T2DM	5320	PLA2G2A	phospholipase A2, group IIA (platelets, synovial fluid)
T2DM	7941	PLA2G7	phospholipase A2, group VII (platelet-activating factor acetylhydrolase, plasma)
T2DM	5327	PLAT	plasminogen activator, tissue
T2DM	5328	PLAU	plasminogen activator, urokinase
T2DM	5340	PLG	plasminogen
T2DM	5443	POMC	proopiomelanocortin
T2DM	5465	PPARA	peroxisome proliferator-activated receptor alpha
T2DM	5468	PPARG	peroxisome proliferator-activated receptor gamma
T2DM	5743	PTGS2	prostaglandin-endoperoxide synthase 2 (prostaglandin G/H synthase and cyclooxygenase)
T2DM	5770	PTPN1	protein tyrosine phosphatase, non-receptor type 1
T2DM	5788	PTPRC	protein tyrosine phosphatase, receptor type, C
T2DM	5979	RET	ret proto-oncogene
T2DM	6401	SELE	selectin E
T2DM	6402	SELL	selectin L
T2DM	6403	SELP	selectin P (granule membrane protein 140kDa, antigen CD62)
T2DM	5265	SERPINA1	serpin peptidase inhibitor, clade A (alpha-1 antiproteinase, antitrypsin), member 1
T2DM	5054	SERPINE1	serpin peptidase inhibitor, clade E (nexin, plasminogen activator inhibitor type 1), member 1
T2DM	6446	SGK1	serum/glucocorticoid regulated kinase 1
T2DM	6469	SHH	sonic hedgehog
T2DM	4089	SMAD4	SMAD family member 4
T2DM	6647	SOD1	superoxide dismutase 1, soluble
T2DM	6648	SOD2	superoxide dismutase 2, mitochondrial
T2DM	6696	SPP1	secreted phosphoprotein 1
T2DM	7015	TERT	telomerase reverse transcriptase
T2DM	7018	TF	transferrin
T2DM	7037	TFRC	transferrin receptor (p90, CD71)
T2DM	7040	TGFB1	transforming growth factor, beta 1
T2DM	7046	TGFBR1	transforming growth factor, beta receptor 1
T2DM	7077	TIMP2	TIMP metallopeptidase inhibitor 2
T2DM	7099	TLR4	toll-like receptor 4
T2DM	7124	TNF	tumor necrosis factor
T2DM	7132	TNFRSF1A	tumor necrosis factor receptor superfamily, member 1A
T2DM	7133	TNFRSF1B	tumor necrosis factor receptor superfamily, member 1B
T2DM	7157	TP53	tumor protein p53
T2DM	7421	VDR	vitamin D (1,25- dihydroxyvitamin D3) receptor
T2DM	7422	VEGFA	vascular endothelial growth factor A
T2DM	7450	VWF	von Willebrand factor
Inflammation	5243	ABCB1	ATP-binding cassette, sub-family B (MDR/TAP), member 1
Inflammation	59272	ACE2	angiotensin I converting enzyme (peptidyl-dipeptidase A) 2
Inflammation	90	ACVR1	activin A receptor, type I
Inflammation	102	ADAM10	ADAM metallopeptidase domain 10
Inflammation	8038	ADAM12	ADAM metallopeptidase domain 12
Inflammation	132	ADK	adenosine kinase
Inflammation	134	ADORA1	adenosine A1 receptor
Inflammation	154	ADRB2	adrenoceptor beta 2, surface
Inflammation	185	AGTR1	angiotensin II receptor, type 1
Inflammation	231	AKR1B1	aldo-keto reductase family 1, member B1 (aldose reductase)
Inflammation	207	AKT1	v-akt murine thymoma viral oncogene homolog 1
Inflammation	290	ANPEP	alanyl (membrane) aminopeptidase
Inflammation	301	ANXA1	annexin A1
Inflammation	308	ANXA5	annexin A5
Inflammation	351	APP	amyloid beta (A4) precursor protein
Inflammation	383	ARG1	arginase, liver
Inflammation	590	BCHE	butyrylcholinesterase
Inflammation	598	BCL2L1	BCL2-like 1
Inflammation	652	BMP4	bone morphogenetic protein 4
Inflammation	655	BMP7	bone morphogenetic protein 7
Inflammation	658	BMPR1B	bone morphogenetic protein receptor, type IB
Inflammation	659	BMPR2	bone morphogenetic protein receptor, type II (serine/threonine kinase)
Inflammation	673	BRAF	v-raf murine sarcoma viral oncogene homolog B1
Inflammation	695	BTK	Bruton agammaglobulinemia tyrosine kinase
Inflammation	718	C3	complement component 3
Inflammation	760	CA2	carbonic anhydrase II
Inflammation	811	CALR	calreticulin
Inflammation	834	CASP1	caspase 1, apoptosis-related cysteine peptidase
Inflammation	836	CASP3	caspase 3, apoptosis-related cysteine peptidase
Inflammation	841	CASP8	caspase 8, apoptosis-related cysteine peptidase
Inflammation	847	CAT	catalase
Inflammation	857	CAV1	caveolin 1, caveolae protein, 22kDa
Inflammation	867	CBL	Cbl proto-oncogene, E3 ubiquitin protein ligase
Inflammation	875	CBS	cystathionine-beta-synthase
Inflammation	887	CCKBR	cholecystokinin B receptor
Inflammation	6347	CCL2	chemokine (C-C motif) ligand 2
Inflammation	890	CCNA2	cyclin A2
Inflammation	947	CD34	CD34 molecule
Inflammation	960	CD44	CD44 molecule (Indian blood group)
Inflammation	1003	CDH5	cadherin 5, type 2 (vascular endothelium)
Inflammation	1017	CDK2	cyclin-dependent kinase 2
Inflammation	3075	CFH	complement factor H
Inflammation	1131	CHRM3	cholinergic receptor, muscarinic 3
Inflammation	1191	CLU	clusterin
Inflammation	1277	COL1A1	collagen, type I, alpha 1
Inflammation	1281	COL3A1	collagen, type III, alpha 1
Inflammation	1312	COMT	catechol-O-methyltransferase
Inflammation	1445	CSK	c-src tyrosine kinase
Inflammation	1508	CTSB	cathepsin B
Inflammation	1513	CTSK	cathepsin K
Inflammation	7852	CXCR4	chemokine (C-X-C motif) receptor 4
Inflammation	1543	CYP1A1	cytochrome P450, family 1, subfamily A, polypeptide 1
Inflammation	1544	CYP1A2	cytochrome P450, family 1, subfamily A, polypeptide 2
Inflammation	1644	DDC	dopa decarboxylase (aromatic L-amino acid decarboxylase)
Inflammation	1786	DNMT1	DNA (cytosine-5-)-methyltransferase 1
Inflammation	1889	ECE1	endothelin converting enzyme 1
Inflammation	1909	EDNRA	endothelin receptor type A
Inflammation	1958	EGR1	early growth response 1
Inflammation	2033	EP300	E1A binding protein p300
Inflammation	2065	ERBB3	v-erb-b2 erythroblastic leukemia viral oncogene homolog 3 (avian)
Inflammation	2066	ERBB4	v-erb-a erythroblastic leukemia viral oncogene homolog 4 (avian)
Inflammation	2113	ETS1	v-ets erythroblastosis virus E26 oncogene homolog 1 (avian)
Inflammation	2159	F10	coagulation factor X
Inflammation	2158	F9	coagulation factor IX
Inflammation	355	FAS	Fas (TNF receptor superfamily, member 6)
Inflammation	2194	FASN	fatty acid synthase
Inflammation	2246	FGF1	fibroblast growth factor 1 (acidic)
Inflammation	2247	FGF2	fibroblast growth factor 2 (basic)
Inflammation	2260	FGFR1	fibroblast growth factor receptor 1
Inflammation	2263	FGFR2	fibroblast growth factor receptor 2
Inflammation	2321	FLT1	fms-related tyrosine kinase 1
Inflammation	2322	FLT3	fms-related tyrosine kinase 3
Inflammation	2324	FLT4	fms-related tyrosine kinase 4
Inflammation	2335	FN1	fibronectin 1
Inflammation	2353	FOS	FBJ murine osteosarcoma viral oncogene homolog
Inflammation	2597	GAPDH	glyceraldehyde-3-phosphate dehydrogenase
Inflammation	2629	GBA	glucosidase, beta, acid
Inflammation	2697	GJA1	gap junction protein, alpha 1, 43kDa
Inflammation	2752	GLUL	glutamate-ammonia ligase
Inflammation	2821	GPI	glucose-6-phosphate isomerase
Inflammation	2932	GSK3B	glycogen synthase kinase 3 beta
Inflammation	3065	HDAC1	histone deacetylase 1
Inflammation	3066	HDAC2	histone deacetylase 2
Inflammation	3082	HGF	hepatocyte growth factor (hepapoietin A; scatter factor)
Inflammation	3091	HIF1A	hypoxia inducible factor 1, alpha subunit (basic helix-loop-helix transcription factor)
Inflammation	3099	HK2	hexokinase 2
Inflammation	3162	HMOX1	heme oxygenase (decycling) 1
Inflammation	3163	HMOX2	heme oxygenase (decycling) 2
Inflammation	3265	HRAS	v-Ha-ras Harvey rat sarcoma viral oncogene homolog
Inflammation	3303	HSPA1A	heat shock 70kDa protein 1A
Inflammation	3312	HSPA8	heat shock 70kDa protein 8
Inflammation	3315	HSPB1	heat shock 27kDa protein 1
Inflammation	3383	ICAM1	intercellular adhesion molecule 1
Inflammation	3551	IKBKB	inhibitor of kappa light polypeptide gene enhancer in B-cells, kinase beta
Inflammation	3553	IL1B	interleukin 1, beta
Inflammation	3554	IL1R1	interleukin 1 receptor, type I
Inflammation	3558	IL2	interleukin 2
Inflammation	3559	IL2RA	interleukin 2 receptor, alpha
Inflammation	3569	IL6	interleukin 6 (interferon, beta 2)
Inflammation	3576	IL8	interleukin 8
Inflammation	3643	INSR	insulin receptor
Inflammation	3654	IRAK1	interleukin-1 receptor-associated kinase 1
Inflammation	3667	IRS1	insulin receptor substrate 1
Inflammation	3676	ITGA4	integrin, alpha 4 (antigen CD49D, alpha 4 subunit of VLA-4 receptor)
Inflammation	3688	ITGB1	integrin, beta 1 (fibronectin receptor, beta polypeptide, antigen CD29 includes MDF2, MSK12)
Inflammation	3689	ITGB2	integrin, beta 2 (complement component 3 receptor 3 and 4 subunit)
Inflammation	3690	ITGB3	integrin, beta 3 (platelet glycoprotein IIIa, antigen CD61)
Inflammation	3702	ITK	IL2-inducible T-cell kinase
Inflammation	3717	JAK2	Janus kinase 2
Inflammation	3718	JAK3	Janus kinase 3
Inflammation	3725	JUN	jun proto-oncogene
Inflammation	3791	KDR	kinase insert domain receptor (a type III receptor tyrosine kinase)
Inflammation	3932	LCK	lymphocyte-specific protein tyrosine kinase
Inflammation	3949	LDLR	low density lipoprotein receptor
Inflammation	4023	LPL	lipoprotein lipase
Inflammation	4035	LRP1	low density lipoprotein receptor-related protein 1
Inflammation	4067	LYN	v-yes-1 Yamaguchi sarcoma viral related oncogene homolog
Inflammation	4128	MAOA	monoamine oxidase A
Inflammation	6885	MAP3K7	mitogen-activated protein kinase kinase kinase 7
Inflammation	5594	MAPK1	mitogen-activated protein kinase 1
Inflammation	5602	MAPK10	mitogen-activated protein kinase 10
Inflammation	5600	MAPK11	mitogen-activated protein kinase 11
Inflammation	6300	MAPK12	mitogen-activated protein kinase 12
Inflammation	1432	MAPK14	mitogen-activated protein kinase 14
Inflammation	5595	MAPK3	mitogen-activated protein kinase 3
Inflammation	5598	MAPK7	mitogen-activated protein kinase 7
Inflammation	5599	MAPK8	mitogen-activated protein kinase 8
Inflammation	5601	MAPK9	mitogen-activated protein kinase 9
Inflammation	10461	MERTK	c-mer proto-oncogene tyrosine kinase
Inflammation	4311	MME	membrane metallo-endopeptidase
Inflammation	4312	MMP1	matrix metallopeptidase 1 (interstitial collagenase)
Inflammation	4319	MMP10	matrix metallopeptidase 10 (stromelysin 2)
Inflammation	4321	MMP12	matrix metallopeptidase 12 (macrophage elastase)
Inflammation	4322	MMP13	matrix metallopeptidase 13 (collagenase 3)
Inflammation	4313	MMP2	matrix metallopeptidase 2 (gelatinase A, 72kDa gelatinase, 72kDa type IV collagenase)
Inflammation	4314	MMP3	matrix metallopeptidase 3 (stromelysin 1, progelatinase)
Inflammation	4316	MMP7	matrix metallopeptidase 7 (matrilysin, uterine)
Inflammation	4317	MMP8	matrix metallopeptidase 8 (neutrophil collagenase)
Inflammation	4318	MMP9	matrix metallopeptidase 9 (gelatinase B, 92kDa gelatinase, 92kDa type IV collagenase)
Inflammation	4353	MPO	myeloperoxidase
Inflammation	4684	NCAM1	neural cell adhesion molecule 1
Inflammation	4790	NFKB1	nuclear factor of kappa light polypeptide gene enhancer in B-cells 1
Inflammation	4792	NFKBIA	nuclear factor of kappa light polypeptide gene enhancer in B-cells inhibitor, alpha
Inflammation	4842	NOS1	nitric oxide synthase 1 (neuronal)
Inflammation	4846	NOS3	nitric oxide synthase 3 (endothelial cell)
Inflammation	4851	NOTCH1	notch 1
Inflammation	1728	NQO1	NAD(P)H dehydrogenase, quinone 1
Inflammation	2908	NR3C1	nuclear receptor subfamily 3, group C, member 1 (glucocorticoid receptor)
Inflammation	4914	NTRK1	neurotrophic tyrosine kinase, receptor, type 1
Inflammation	4915	NTRK2	neurotrophic tyrosine kinase, receptor, type 2
Inflammation	4916	NTRK3	neurotrophic tyrosine kinase, receptor, type 3
Inflammation	4953	ODC1	ornithine decarboxylase 1
Inflammation	142	PARP1	poly (ADP-ribose) polymerase 1
Inflammation	5155	PDGFB	platelet-derived growth factor beta polypeptide
Inflammation	5159	PDGFRB	platelet-derived growth factor receptor, beta polypeptide
Inflammation	5290	PIK3CA	phosphatidylinositol-4,5-bisphosphate 3-kinase, catalytic subunit alpha
Inflammation	5294	PIK3CG	phosphatidylinositol-4,5-bisphosphate 3-kinase, catalytic subunit gamma
Inflammation	5295	PIK3R1	phosphoinositide-3-kinase, regulatory subunit 1 (alpha)
Inflammation	5320	PLA2G2A	phospholipase A2, group IIA (platelets, synovial fluid)
Inflammation	7941	PLA2G7	phospholipase A2, group VII (platelet-activating factor acetylhydrolase, plasma)
Inflammation	5327	PLAT	plasminogen activator, tissue
Inflammation	5328	PLAU	plasminogen activator, urokinase
Inflammation	5336	PLCG2	phospholipase C, gamma 2 (phosphatidylinositol-specific)
Inflammation	5340	PLG	plasminogen
Inflammation	5465	PPARA	peroxisome proliferator-activated receptor alpha
Inflammation	5468	PPARG	peroxisome proliferator-activated receptor gamma
Inflammation	5578	PRKCA	protein kinase C, alpha
Inflammation	5581	PRKCE	protein kinase C, epsilon
Inflammation	5588	PRKCQ	protein kinase C, theta
Inflammation	5624	PROC	protein C (inactivator of coagulation factors Va and VIIIa)
Inflammation	5663	PSEN1	presenilin 1
Inflammation	5742	PTGS1	prostaglandin-endoperoxide synthase 1 (prostaglandin G/H synthase and cyclooxygenase)
Inflammation	5743	PTGS2	prostaglandin-endoperoxide synthase 2 (prostaglandin G/H synthase and cyclooxygenase)
Inflammation	5747	PTK2	protein tyrosine kinase 2
Inflammation	2185	PTK2B	protein tyrosine kinase 2 beta
Inflammation	5770	PTPN1	protein tyrosine phosphatase, non-receptor type 1
Inflammation	5781	PTPN11	protein tyrosine phosphatase, non-receptor type 11
Inflammation	5777	PTPN6	protein tyrosine phosphatase, non-receptor type 6
Inflammation	5788	PTPRC	protein tyrosine phosphatase, receptor type, C
Inflammation	5879	RAC1	ras-related C3 botulinum toxin substrate 1 (rho family, small GTP binding protein Rac1)
Inflammation	5880	RAC2	ras-related C3 botulinum toxin substrate 2 (rho family, small GTP binding protein Rac2)
Inflammation	5894	RAF1	v-raf-1 murine leukemia viral oncogene homolog 1
Inflammation	5914	RARA	retinoic acid receptor, alpha
Inflammation	5915	RARB	retinoic acid receptor, beta
Inflammation	6197	RPS6KA3	ribosomal protein S6 kinase, 90kDa, polypeptide 3
Inflammation	6198	RPS6KB1	ribosomal protein S6 kinase, 70kDa, polypeptide 1
Inflammation	6256	RXRA	retinoid X receptor, alpha
Inflammation	6401	SELE	selectin E
Inflammation	6402	SELL	selectin L
Inflammation	6403	SELP	selectin P (granule membrane protein 140kDa, antigen CD62)
Inflammation	5265	SERPINA1	serpin peptidase inhibitor, clade A (alpha-1 antiproteinase, antitrypsin), member 1
Inflammation	5054	SERPINE1	serpin peptidase inhibitor, clade E (nexin, plasminogen activator inhibitor type 1), member 1
Inflammation	6446	SGK1	serum/glucocorticoid regulated kinase 1
Inflammation	4087	SMAD2	SMAD family member 2
Inflammation	4089	SMAD4	SMAD family member 4
Inflammation	6647	SOD1	superoxide dismutase 1, soluble
Inflammation	6648	SOD2	superoxide dismutase 2, mitochondrial
Inflammation	6696	SPP1	secreted phosphoprotein 1
Inflammation	6752	SSTR2	somatostatin receptor 2
Inflammation	6772	STAT1	signal transducer and activator of transcription 1, 91kDa
Inflammation	6774	STAT3	signal transducer and activator of transcription 3 (acute-phase response factor)
Inflammation	6776	STAT5A	signal transducer and activator of transcription 5A
Inflammation	6850	SYK	spleen tyrosine kinase
Inflammation	7010	TEK	TEK tyrosine kinase, endothelial
Inflammation	7015	TERT	telomerase reverse transcriptase
Inflammation	7018	TF	transferrin
Inflammation	7037	TFRC	transferrin receptor (p90, CD71)
Inflammation	7040	TGFB1	transforming growth factor, beta 1
Inflammation	7043	TGFB3	transforming growth factor, beta 3
Inflammation	7048	TGFBR2	transforming growth factor, beta receptor II (70/80kDa)
Inflammation	7052	TGM2	transglutaminase 2 (C polypeptide, protein-glutamine-gamma-glutamyltransferase)
Inflammation	7054	TH	tyrosine hydroxylase
Inflammation	7077	TIMP2	TIMP metallopeptidase inhibitor 2
Inflammation	7099	TLR4	toll-like receptor 4
Inflammation	3371	TNC	tenascin C
Inflammation	7124	TNF	tumor necrosis factor
Inflammation	8795	TNFRSF10B	tumor necrosis factor receptor superfamily, member 10b
Inflammation	7132	TNFRSF1A	tumor necrosis factor receptor superfamily, member 1A
Inflammation	7133	TNFRSF1B	tumor necrosis factor receptor superfamily, member 1B
Inflammation	8743	TNFSF10	tumor necrosis factor (ligand) superfamily, member 10
Inflammation	7421	VDR	vitamin D (1,25- dihydroxyvitamin D3) receptor
Inflammation	7422	VEGFA	vascular endothelial growth factor A
Inflammation	7450	VWF	von Willebrand factor
Inflammation	7535	ZAP70	zeta-chain (TCR) associated protein kinase 70kDa
